# Supplementary material for: A comparison of adhesive polysulfides initiated by garlic essential oil and elemental sulfur to create recyclable adhesives
Source: Royal Society of Chemistry journal article supplement (doi:10.1039/d2py00418f), 2022-01-01
Supplement: d2py00418f1.pdf [file d2py00418f1.pdf]

## Supporting Information

### A Comparison of Adhesive Polysulfides Initiated by Garlic Essential Oil and Elemental Sulfur to Create Recyclable Adhesives

*Anthony E. Davis, Kyler B. Sayer, and Courtney L. Jenkins\**

Department of Chemistry, Idaho State University, 921 South 8th Ave, Pocatello, ID 83209  
United States.

\*Email:jenkcour@isu.edu

**Figure S1:** Adhesion strength of poly(S-GEO-myrcene) made with 70% myrcene, 0-30% garlic essential oil (GEO) and the remainder being elemental sulfur (S<sub>8</sub>).

**Figure S2:** <sup>1</sup>H NMR of polysulfides made with 50% linalool and the remaining 50% composed of various S:GEO ratios in chloroform-*d*.

**Figure S3:** <sup>1</sup>H NMR of poly(GEO-linalool) compared to poly(DADS-linalool) in chloroform-*d*.

**Figure S4:** HSQC NMR of garlic essential oil (GEO) in chloroform-*d*.

**Figure S5:** HSQC NMR of poly(GEO-linalool) in chloroform-*d*.

**Figure S6:** Differential scanning calorimetry of polysulfides made with 50% linalool and the remaining 50% composed of various S:GEO ratios.

**Figure S7:** Qualitative reprocessing analysis of poly(S-GEO-linalool) made with 50% linalool and the remaining 50% composed of various S:GEO ratios before (left) and after (right) curing at 160 °C for 30 min.

**Table S1:** Adhesion strength of polysulfides formed with elemental sulfur versus garlic essential oil (GEO) with a variety of monomers.

**Table S2:** A comparison of maximum adhesion strength to the work of adhesion for poly(S-GEO-linalool) with varied the S:GEO ratios.

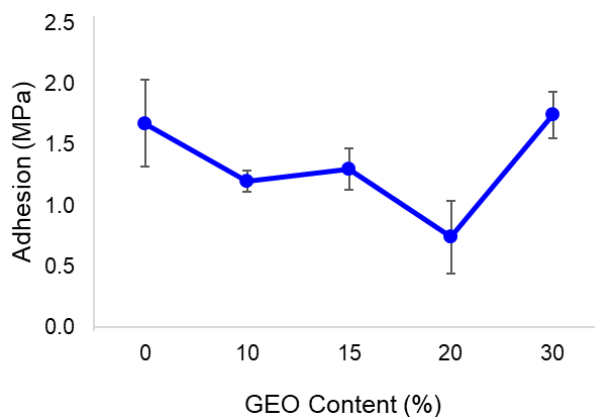

**Figure S1:** Adhesion strength of poly(S-GEO-myrcene) made with 70% myrcene, 0-30% garlic essential oil (GEO) and the remainder being elemental sulfur ( $S_8$ ).

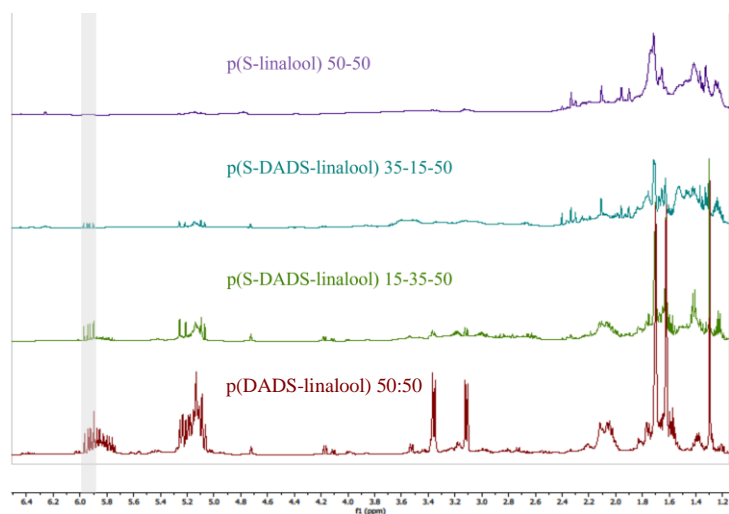

**Figure S2:**  $^1H$  NMR of polysulfides made with 50% linalool and the remaining 50% composed of various S:GEO ratios in chloroform-*d*.

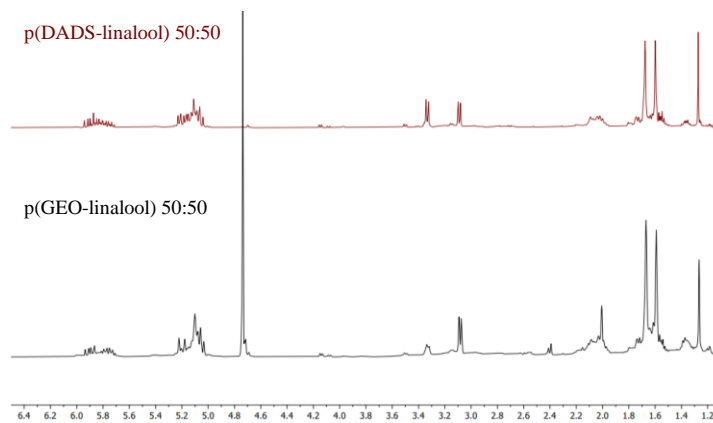

**Figure S3:**  $^1H$  NMR of poly(GEO-linalool) compared to poly(DADS-linalool) in chloroform-*d*.

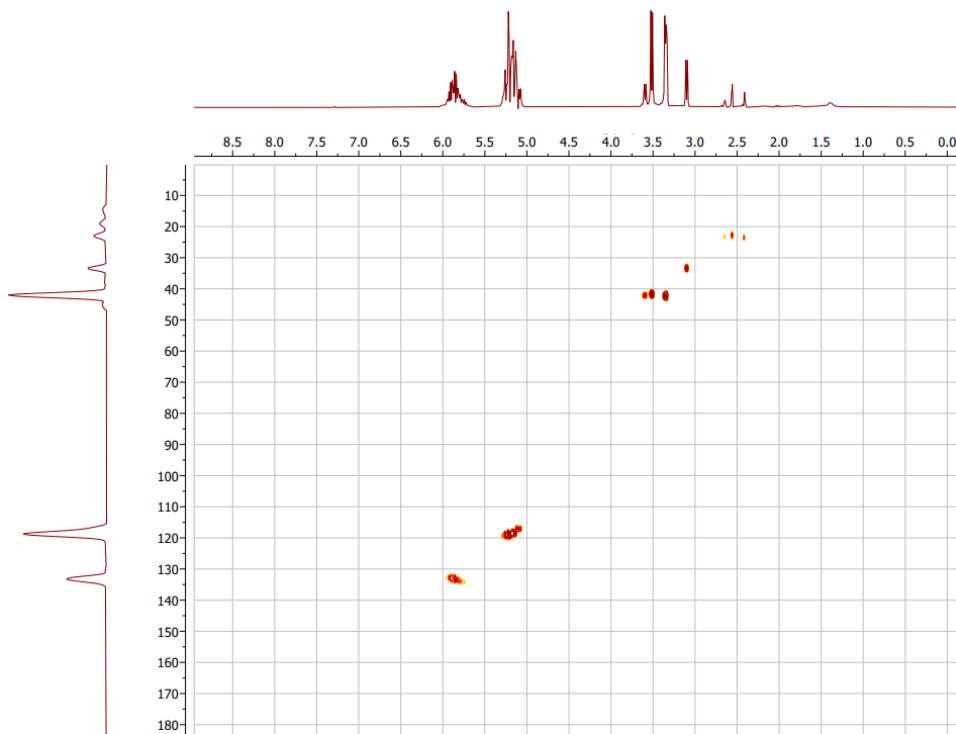

**Figure S4:** HSQC NMR of garlic essential oil (GEO) in chloroform-*d*.

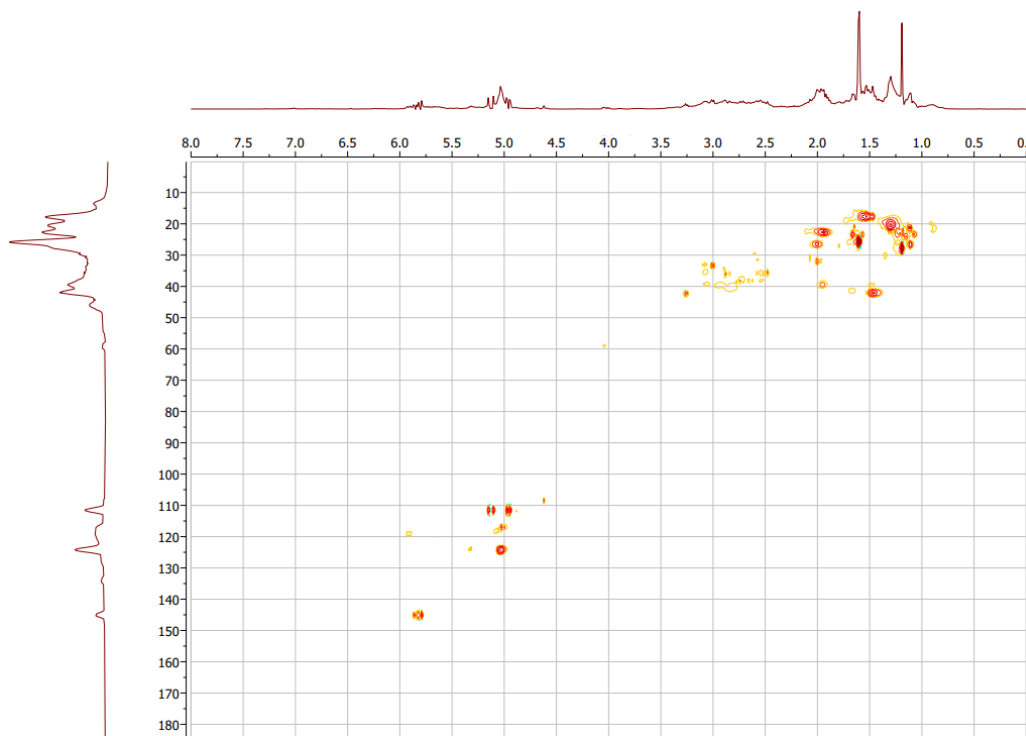

**Figure S5:** HSQC NMR of poly(GEO-linalool) in chloroform-*d*.

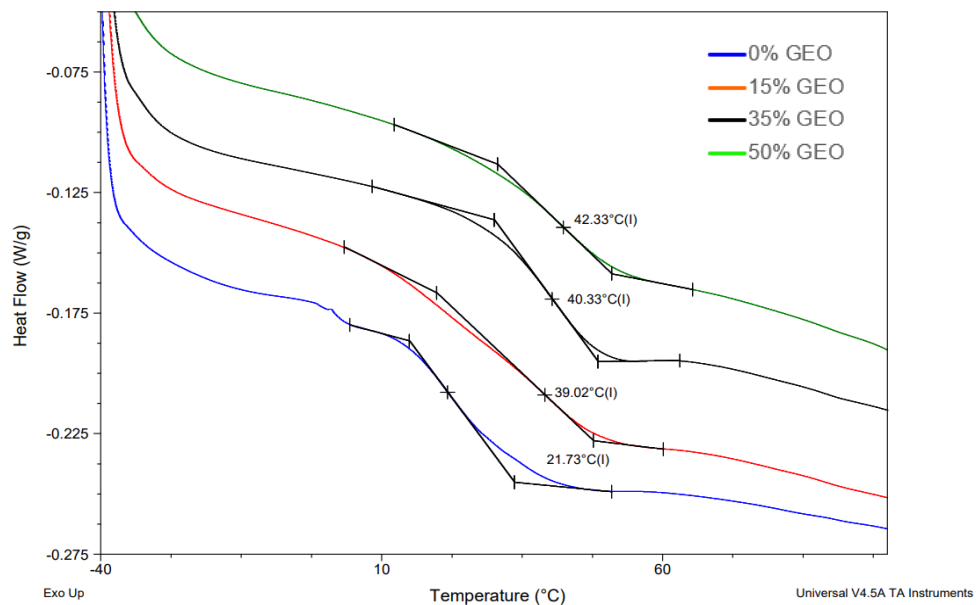

**Figure S6:** Differential scanning calorimetry of polysulfides made with 50% linalool and the remaining 50% composed of various S:GEO ratios.

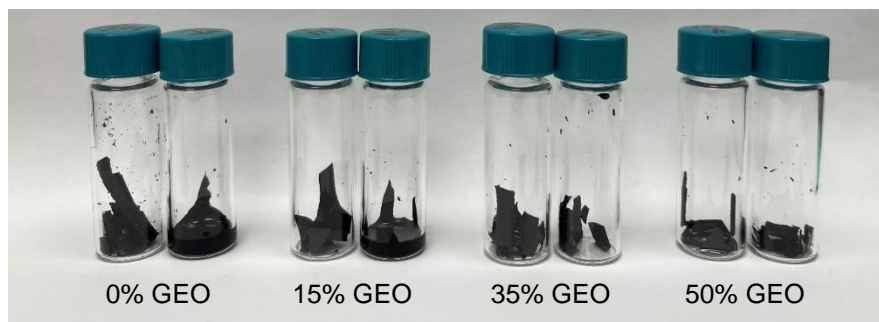

**Figure S7:** Qualitative reprocessing analysis of poly(S-GEO-linalool) made with 50% linalool and the remaining 50% composed of various S:GEO ratios before (left) and after (right) curing at 160 °C for 30 min.

**Table S1:** Adhesion strength of polysulfides formed with elemental sulfur versus garlic essential oil (GEO) with a variety of monomers.

| Monomer           | Maximum Adhesion Strength (MPa) |             |
|-------------------|---------------------------------|-------------|
|                   | Elemental Sulfur                | GEO         |
| GEO               | 1.91 ± 0.19                     | 0.68 ± 0.11 |
| limonene          | 0.88 ± 0.49                     | 1.32 ± 0.43 |
| linalool          | 0.45 ± 0.13                     | 1.78 ± 0.44 |
| myrcene           | 1.72 ± 0.43                     | 1.74 ± 0.11 |
| dicyclopentadiene | 0.93 ± 0.23                     | 2.11 ± 0.44 |

**Table S2:** A comparison of maximum adhesion strength to the work of adhesion for poly(S-GEO-linalool) with varied the S:GEO ratios.

| GEO Content | Work of Adhesion (mJ) | Adhesion (MPa) |
|-------------|-----------------------|----------------|
| 0           | 121 ± 12              | 0.63 ± 0.24    |
| 15          | 72 ± 26               | 0.78 ± 0.18    |
| 35          | 53 ± 16               | 0.73 ± 0.16    |
| 50          | 35 ± 5                | 0.99 ± 0.11    |

Terpolymers all contain 50% linalool by weight.
